# Supplementary material
Source: MDPI journal article supplement (https://www.mdpi.com/1424-2818/14/9/746)
Supplement: s1 [file s1]

## Supplementary Tables

Gallo Vaulet, L.; Vanstreels, R.E.T.; Gallo, L.; Entrocassi, A.C.; Peker, L.; Blanco, G.S.; Rago, M.V.; Rodriguez Fermepin, M.; Uhart, M.M. 2022. *Chlamydiaceae*-Like Bacterium in Wild Magellanic Penguins (*Spheniscus magellanicus*). Diversity. Correspondence to: Ralph E. T. Vanstreels ([ralph\\_vanstreels@yahoo.com.br](mailto:ralph_vanstreels@yahoo.com.br)).

**Table S1.** Diagnostic results for cloacal swabs of Magellanic penguins (*Spheniscus magellanicus*) tested using a real-time PCR test targeting the 23S rRNA gene of *Chlamydiaceae*.

| Colony                  | Stage and season     | Age class | Swab storage <sup>1</sup> | Samples tested | Samples positive | %    | Quantification cycle, mean $\pm$ SD (range) |
|-------------------------|----------------------|-----------|---------------------------|----------------|------------------|------|---------------------------------------------|
| Punta Norte/San Lorenzo | Post-guard 2013/2014 | Chick     | D                         | 3              | 0                | 0    | Not applicable                              |
|                         |                      | Adult     | D                         | 13             | 8                | 61.5 | 35.3 $\pm$ 2.3 (32 – 38)                    |
|                         | Guard 2017/2018      | Chick     | D                         | 6              | 1                | 16.7 | 38.6                                        |
|                         |                      |           | CM                        | 5              | 3                | 60.0 | 39.4 $\pm$ 0.5 (39 – 39.9)                  |
|                         |                      | Adult     | D                         | 15             | 5                | 33.3 | 35.9 $\pm$ 2.7 (31.6 – 39.1)                |
|                         |                      |           | CM                        | 13             | 5                | 38.5 | 39.1 $\pm$ 0.6 (38.2 – 39.6)                |
| Punta Tombo             | Post-guard 2013/2014 | Adult     | D                         | 22             | 10               | 45.5 | 36.1 $\pm$ 3.3 (31 – 40)                    |
| Cabo Dos Bahías         | Post-guard 2013/2014 | Adult     | D                         | 20             | 10               | 50.0 | 37.3 $\pm$ 2.5 (33 – 42)                    |
|                         |                      |           | D                         | 10             | 2                | 20.0 | 30.8 $\pm$ 9.2 (24.3 – 37.3)                |
|                         | Incubation 2015/2016 | Adult     | CM                        | 18             | 7                | 38.9 | 36.5 $\pm$ 2.1 (32.5 – 38.3)                |
|                         |                      |           | CM                        | 26             | 7                | 26.9 | 35.7 $\pm$ 3.0 (31 – 38)                    |
| Isla Vernacci Fondo     | Post-guard 2013/2014 | Adult     | D                         | 16             | 3                | 18.8 | 37.7 $\pm$ 1.5 (36 – 39)                    |
| Total                   |                      |           |                           | 167            | 61               | 36.5 | 36.5 $\pm$ 3.0 (24.3 – 42)                  |

Note: <sup>1</sup> Swabs were placed in either dry tubes (D) or in tubes containing culture medium (CM) before freezing.

**Table S2.** Sequence of primers and probes employed.

| Primer or Probe | Sequence (5' - 3')                       |
|-----------------|------------------------------------------|
| Ch23S-F         | CTG AAA CCA GTA GCT TAT AAG CGG T        |
| Ch23S-R         | ACC TCG CCG TTT AAC TTA ACT CC           |
| Ch23S-p         | FAM-CTC ATC ATG CAA AAG GCA CGC CG-TAMRA |
| Cpps-F          | CAC TAT GTG GGA AGG TGC TTC A            |
| Cpps-R          | CTG CGC GGA TGC TAA TGG                  |
| Cpps-S          | FAM-CGC TAC TTG GTG TGA C-BHQ1           |
| 16SIGF          | CGG CGT GGT TGA GGA AT                   |
| 16SIGR          | TCA GTC CCA GTG TTG GC                   |
| 16SF2           | CCG CCC GTC ACA TCA TGG                  |
| 23SIGR          | TGG CTC ATC ATG CAA AAG GCA              |

**Table S3.** GenBank accession codes of the DNA sequences evaluated in this study (16S rRNA gene, 16S/23S intergenic spacer, and 23 S rRNA gene).

| Organism                                                 | Accession codes                    |
|----------------------------------------------------------|------------------------------------|
| <i>Chlamydiales</i> sp. SM1420 (this study)              | OL870320.1 and OL873322.1          |
| <i>Chlamydiales</i> sp. 12-1761_J072                     | LN810447.1 and LN810461.1          |
| <i>Chlamydiales</i> sp. 12-3998_AO053                    | LN810449.1 and LN810463.1          |
| <i>Chlamydiales</i> sp. 136621                           | KP211380.1                         |
| <i>Chlamydiales</i> sp. C122                             | GU068510.1                         |
| <i>Chlamydia abortus</i> S26/3                           | CR848038.1:992074-996789           |
| <i>Chlamydia avium</i> 10DC88                            | CP006571.1:718307-723013           |
| <i>Chlamydia buteonis</i> RSHA                           | NZ_CAAAFM010000001.1:300013-304729 |
| <i>Chlamydia caviae</i> GPIC                             | AE015925.1:1020808-1025525         |
| <i>Chlamydia felis</i> Fe/C-56                           | AP006861.1:147704-152421           |
| <i>Chlamydia gallinacea</i> 08-1274/3                    | CP015840.1:281447-286166           |
| <i>Chlamydia ibidis</i> 10-1398/6                        | NZ_APJW010000003.1:241606-246333   |
| <i>Chlamydia muridarum</i> Nigg                          | CP027211.1:133832-138572           |
| <i>Chlamydia pecorum</i> E58                             | CP002608.1:159116-163827           |
| <i>Chlamydia pneumoniae</i> CWL029                       | AE001363.1:1000564-1005278         |
| <i>Chlamydia poikilothermis</i> S15-834K                 | LS992154.1:1002686-1007399         |
| <i>Chlamydia psittaci</i> 6BC                            | CP002586.1:1019219-1023929         |
| <i>Chlamydia serpentis</i> H15-1957-10C                  | LT993738.1:972227-976940           |
| <i>Chlamydia suis</i> SWA-2                              | NZ_LT821323.1:887563-892290        |
| <i>Chlamydia trachomatis</i> D/UW-3/CX                   | AE001273.1:854128-858862           |
| <i>Candidatus Chlamydia coralli</i> G3/2742-324          | NZ_NWQK010000001.1:446079-450797   |
| <i>Candidatus Chlamydia sanziniae</i> 2742-308           | CP014639.1:554775-559459           |
| <i>Candidatus Chlamydia testudinis</i> 17-3921_L77       | NZ_CACSG010000003.1:75444-80165    |
| <i>Chlamydiifrater phoenicopteri</i> 14-2711_R47         | NZ_LR777658.1:1150415-1155131      |
| <i>Chlamydiifrater volucris</i> 15-2067_O50              | NZ_LR777654.1:57265-61981          |
| <i>Criblamydia sequanensis</i> CRIB-18                   | DQ124300.1 and JN201882.1          |
| <i>Parachlamydia acanthamoebae</i> UV-7                  | FR872580.1:768411-773250           |
| <i>Simkania negevensis</i> Z                             | FR872582.1:370012-374799           |
| <i>Waddlia chondrophila</i> WSU_86-1044                  | CP001928.1:1836312-1840994         |
| <i>Candidatus Amphibiichlamydia ranarum</i> AMCS11/3     | JN402380.1                         |
| <i>Candidatus Amphibiichlamydia salamandrae</i> AMCS11/1 | JN392919.1                         |
| <i>Candidatus Clavichlamydia salmonicola</i> ET          | NZ_WTCQ010000001.1:165185-169940   |
| <i>Candidatus Similichlamydia latridicola</i> Hat2       | QQBG01000012.1:206-4857            |
| <i>Candidatus Rhabdochlamydia porcellionis</i> 15C       | CP075585.1:1017984-1022723         |

**Table S4.** Estimates of evolutionary divergence (number of base substitutions per site in the 16S–23S rRNA region) of *Chlamydiaceae*-like strains from aquatic birds.

| Organism                                              | (1)    | (2)    | (3)    | (4)    | (5)    | (6)    | (7)    |
|-------------------------------------------------------|--------|--------|--------|--------|--------|--------|--------|
| <b>Unidentified <i>Chlamydiales</i> from seabirds</b> |        |        |        |        |        |        |        |
| (1) SM1420 from Magellanic penguin                    | –      | 0.0148 | 0.0295 | 0.0354 | 0.0390 | 0.0613 | 0.0655 |
| (2) 136621 from chinstrap penguin                     | 0.0148 | –      | 0.0421 | 0.0469 | 0.0426 | 0.0595 | 0.0686 |
| (3) C122 from glaucous-winged gull                    | 0.0295 | 0.0421 | –      | 0.0044 | 0.0015 | 0.0296 | 0.0304 |
| (4) 12-3998_AO053 from European herring gull          | 0.0354 | 0.0469 | 0.0044 | –      | 0.0062 | 0.0323 | 0.0362 |
| (5) 12-1761_J072 from European herring gull           | 0.0390 | 0.0426 | 0.0015 | 0.0062 | –      | 0.0299 | 0.0351 |
| <b><i>Chlamydiifrater</i></b>                         |        |        |        |        |        |        |        |
| (6) <i>Chlamydiifrater volucris</i> 15-2067_O50       | 0.0613 | 0.0595 | 0.0296 | 0.0323 | 0.0299 | –      | 0.0071 |
| (7) <i>Chlamydiifrater phoenicopteri</i> 14-2711_R47  | 0.0655 | 0.0686 | 0.0304 | 0.0362 | 0.0351 | 0.0071 | –      |
| <b><i>Chlamydia</i></b>                               |        |        |        |        |        |        |        |
| <i>Chlamydia ibidis</i> 10-1398/6                     | 0.1448 | 0.1737 | 0.0695 | 0.0769 | 0.0762 | 0.0600 | 0.0614 |
| <i>Chlamydia pneumoniae</i> CWL029                    | 0.1496 | 0.2036 | 0.0903 | 0.0853 | 0.0847 | 0.0669 | 0.0668 |
| <i>Chlamydia serpentis</i> H15-1957-10C               | 0.1528 | 0.1891 | 0.0865 | 0.0819 | 0.0825 | 0.0623 | 0.0624 |
| <i>Ca. Chlamydia coralli</i> G3_2742-324              | 0.1559 | 0.2020 | 0.0900 | 0.0872 | 0.0865 | 0.0625 | 0.0632 |
| <i>Chlamydia buteonis</i> RSHA                        | 0.1560 | 0.1844 | 0.0815 | 0.0786 | 0.0798 | 0.0631 | 0.0626 |
| <i>Chlamydia psittaci</i> 6BC                         | 0.1569 | 0.1788 | 0.0790 | 0.0818 | 0.0817 | 0.0651 | 0.0638 |
| <i>Ca. Chlamydia sanziniae</i> 2742-308               | 0.1587 | 0.2049 | 0.0853 | 0.0868 | 0.0836 | 0.0706 | 0.0731 |
| <i>Chlamydia abortus</i> S26/3                        | 0.1601 | 0.1895 | 0.0814 | 0.0836 | 0.0835 | 0.0674 | 0.0670 |
| <i>Chlamydia gallinacea</i> 08-1274/3                 | 0.1659 | 0.1646 | 0.0689 | 0.0829 | 0.0822 | 0.0666 | 0.0672 |
| <i>Chlamydia pecorum</i> E58                          | 0.1677 | 0.2066 | 0.0833 | 0.0813 | 0.0813 | 0.0667 | 0.0666 |
| <i>Chlamydia avium</i> 10DC88                         | 0.1714 | 0.1861 | 0.0762 | 0.0830 | 0.0846 | 0.0692 | 0.0680 |
| <i>Ca. Chlamydia testudinis</i> 17-3921_L77           | 0.1733 | 0.2189 | 0.0839 | 0.0885 | 0.0898 | 0.0667 | 0.0677 |
| <i>Chlamydia felis</i> Fe/C-56                        | 0.1737 | 0.1740 | 0.0791 | 0.0858 | 0.0857 | 0.0694 | 0.0693 |
| <i>Chlamydia poikilothermis</i> S15-834K              | 0.1749 | 0.1779 | 0.0797 | 0.0881 | 0.0866 | 0.0697 | 0.0703 |
| <i>Chlamydia caviae</i> GPIC                          | 0.1795 | 0.1732 | 0.0781 | 0.0887 | 0.0885 | 0.0702 | 0.0703 |
| <i>Chlamydia muridarum</i> Nigg                       | 0.2386 | 0.1912 | 0.0875 | 0.1139 | 0.1189 | 0.0939 | 0.0940 |
| <i>Chlamydia trachomatis</i> D/UW-3/CX                | 0.2471 | 0.2037 | 0.0928 | 0.1217 | 0.1252 | 0.1003 | 0.1003 |
| <i>Chlamydia suis</i> SWA-2                           | 0.2488 | 0.1792 | 0.0906 | 0.1184 | 0.1228 | 0.0975 | 0.0970 |
| <b>Other <i>Chlamydiales</i></b>                      |        |        |        |        |        |        |        |
| <i>Ca. Amphibiichlamydia salamandrae</i> AMCS11/1     | 0.1578 | 0.1854 | 0.1126 | 0.1120 | 0.1144 | 0.1029 | 0.1036 |
| <i>Ca. Amphibiichlamydia ranarum</i> AMCS11/3         | 0.1773 | 0.1991 | 0.1083 | 0.1055 | 0.1061 | 0.0950 | 0.0984 |
| <i>Ca. Clavichlamydia salmonicola</i> ET              | 0.2644 | 0.1876 | 0.1002 | 0.1397 | 0.1387 | 0.1290 | 0.1307 |
| <i>Criblamydia sequanensis</i> CRIB-18                | 0.2857 | 0.2506 | 0.1667 | 0.2046 | 0.2060 | 0.1940 | 0.1946 |
| <i>Parachlamydia acanthamoebae</i> UV-7               | 0.3406 | 0.2651 | 0.1709 | 0.2067 | 0.2029 | 0.1954 | 0.1946 |
| <i>Waddlia chondrophila</i> WSU_86-1044               | 0.3649 | 0.2854 | 0.1929 | 0.2301 | 0.2301 | 0.2208 | 0.2181 |
| <i>Simkania negevensis</i> Z                          | 0.4060 | 0.3654 | 0.2117 | 0.2385 | 0.2426 | 0.3822 | 0.3810 |
| <i>Ca. Rhabdochlamydia porcellionis</i> 15C           | 0.4405 | 0.3579 | 0.2010 | 0.2526 | 0.2534 | 0.2475 | 0.2457 |
| <i>Ca. Similichlamydia latridicola</i> Hat2           | 0.4626 | 0.5073 | 0.2563 | 0.2939 | 0.2917 | 0.2619 | 0.2604 |
